# Supplementary material
Source: publisher figshare collection journal article supplement (https://acs.figshare.com/ndownloader/files/24212005)
Supplement: Supplementary file 1 [file 24212005]

## Supporting Information

### 2D-MoS<sub>2</sub>/BMN Ceramic Hybrid Structure Flexible TFTs with Tunable Device Properties

Junqing Wei<sup>1,2</sup>, Shihui Yu<sup>1</sup>, Xin Shan<sup>3</sup>, Kuibo Lan<sup>1,2</sup>, Xiaodong Yang<sup>1,2</sup>, Kailiang Zhang<sup>3,\*</sup>, Guoxuan Qin<sup>1,2,\*</sup>

<sup>1</sup>School of Microelectronics, Tianjin University, Tianjin 300072, P. R. China

<sup>2</sup>Tianjin Key Laboratory of Imaging and Sensing Microelectronic Technology, Tianjin University, Tianjin 300072, P. R. China

<sup>3</sup>School of Electrical and Electronic Engineering, Tianjin Key Laboratory of Film Electronic & Communication Devices, Tianjin University of Technology, Tianjin, 300384, P. R. China

\*Corresponding author e-mails: gqin@tju.edu.cn (G. Q.), Kailiang\_zhang@163.com (K. Z.)

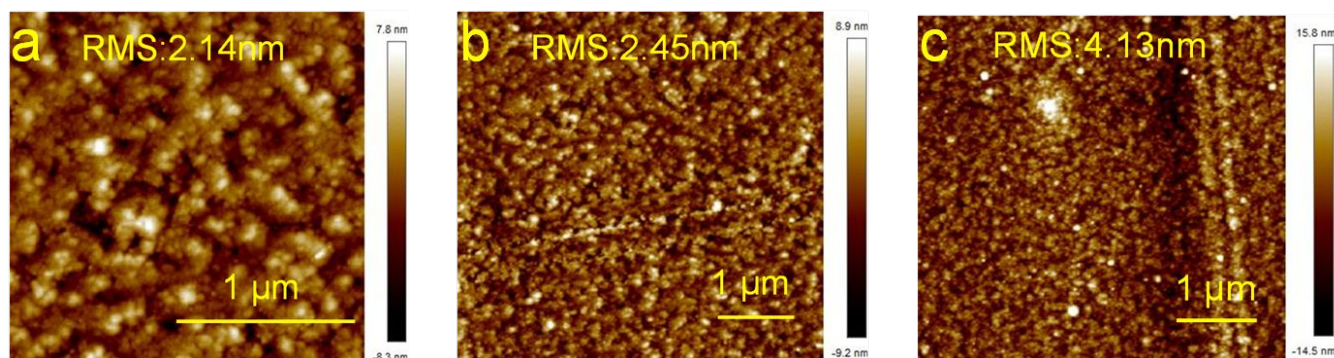

Figure S1. The AFM images of sputtered BMN thin films with topography mode. The topography of sputtered BMN layer in the center region with scanning size of (a)  $2\ \mu\text{m} \times 2\ \mu\text{m}$  and (b)  $5\ \mu\text{m} \times 5\ \mu\text{m}$ , respectively. (c) The topographies of sputtered BMN layer close to the edge region with scanning size of  $5\ \mu\text{m} \times 5\ \mu\text{m}$ .

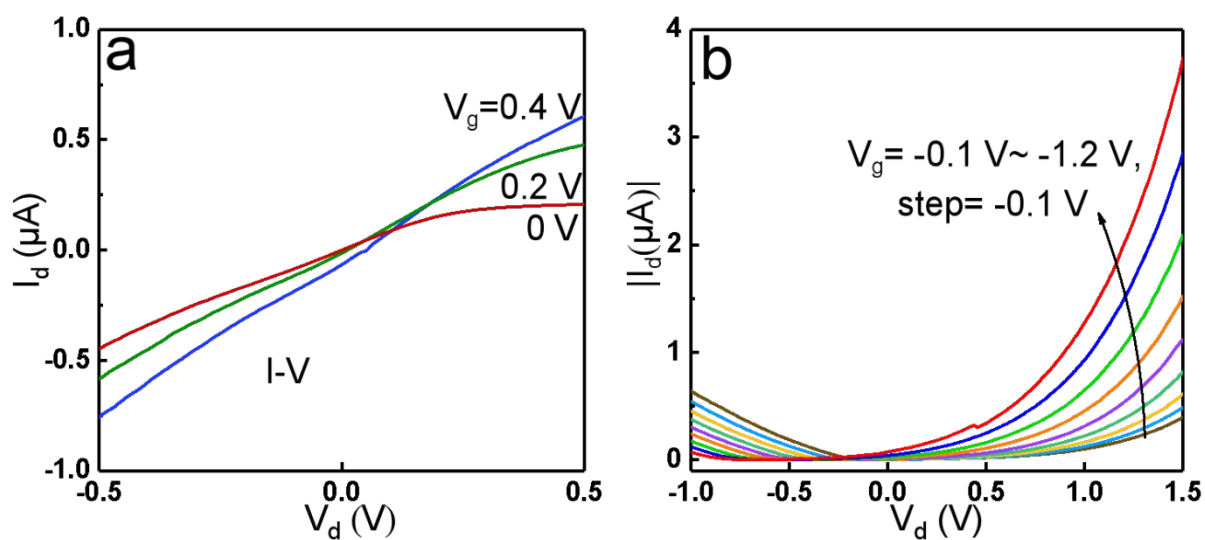

Figure S2. The output characteristics ( $I_d$ - $V_d$ ) of device type 2 with (a) positive  $V_g$  and (b) negative  $V_g$ .

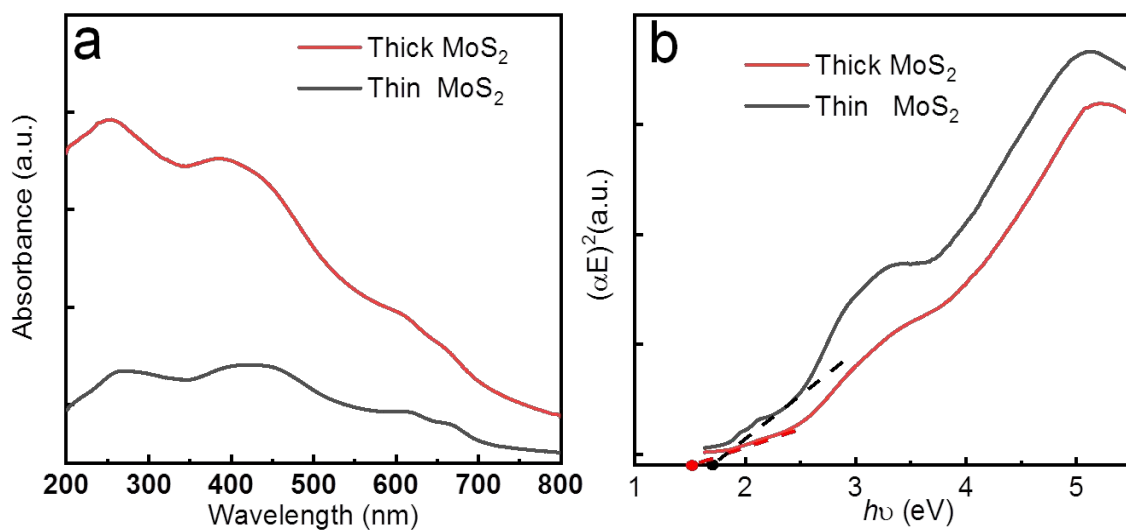

Figure S3. (a) The UV-vis of thin and thick  $\text{MoS}_2$  films; (b) The corresponding plots of  $(\alpha h\nu)^2$ - $h\nu$  to verify the bandgap of thin and thick  $\text{MoS}_2$  films.

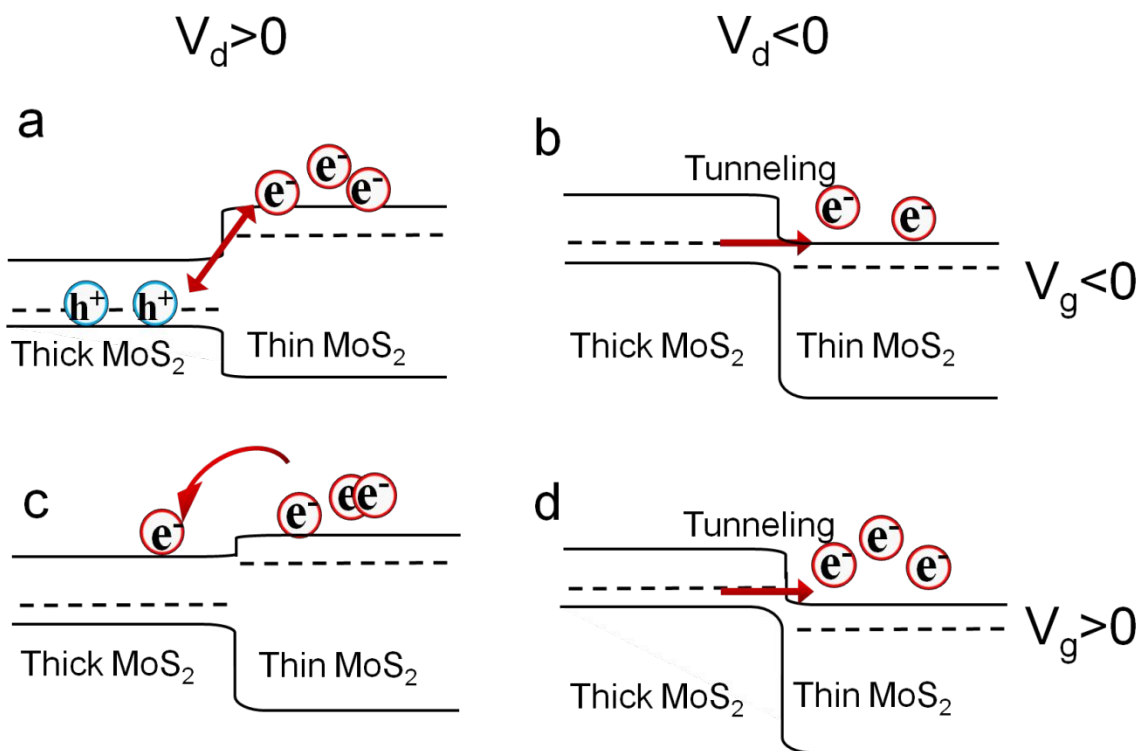

Figure S4. The energy band alignments of the homojunction-MoS<sub>2</sub> device with (a)  $V_d > 0$  V and  $V_g > 0$  V, (b)  $V_d < 0$  V and  $V_g > 0$  V, (c)  $V_d > 0$  V and  $V_g < 0$  V, (d)  $V_d < 0$  V and  $V_g < 0$  V, respectively. (drawn not to scale)

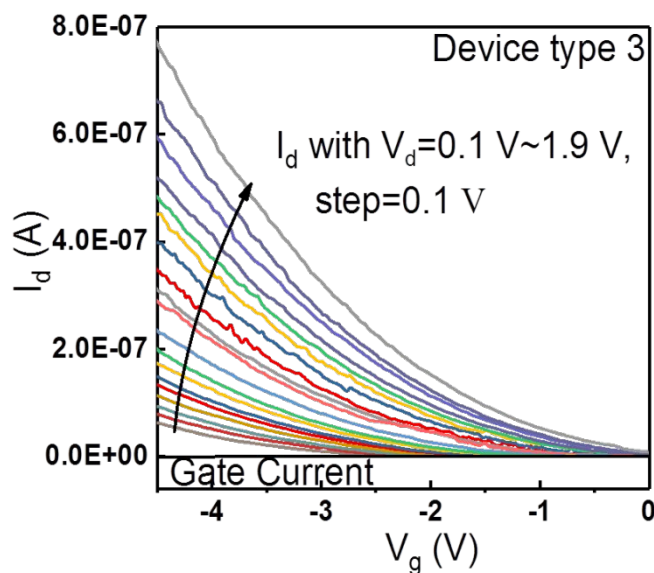

Figure S5. The transfer properties of device type 3 based on thick MoS<sub>2</sub> (~62 nm).

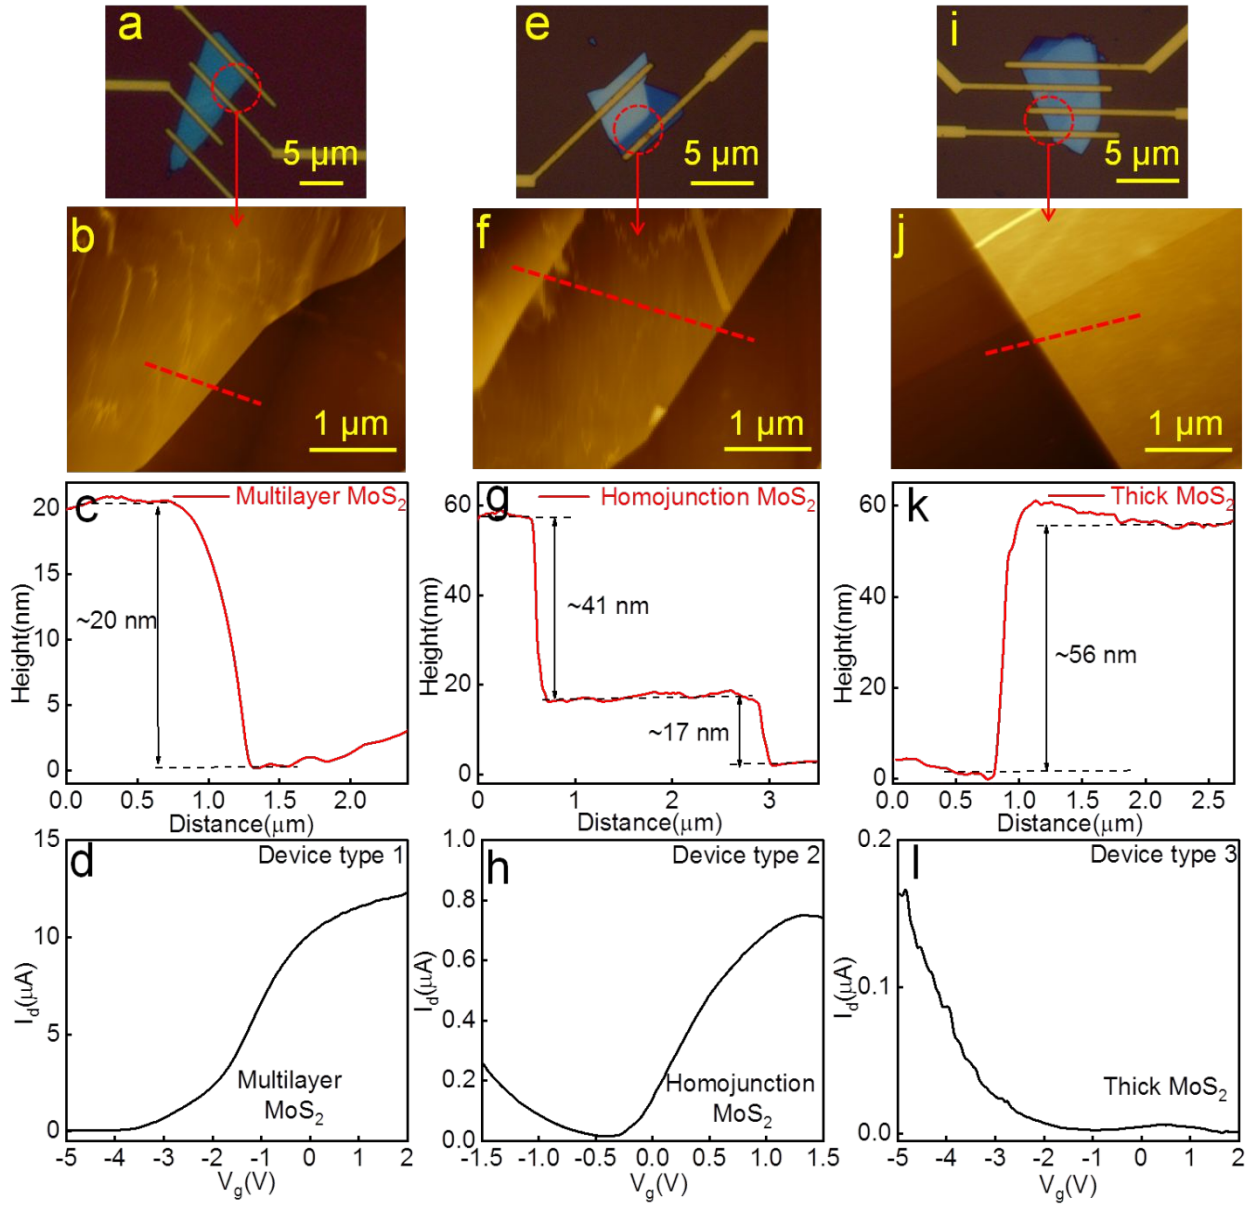

Figure S6. (a) The microscopic image of the multilayer MoS<sub>2</sub> TFT. (b) AFM image of the channel region in the multilayer MoS<sub>2</sub> TFT. (c) The thickness of ~20 nm MoS<sub>2</sub> in the multilayer MoS<sub>2</sub> TFT measured by AFM. (d) The transfer characteristics of the multilayer MoS<sub>2</sub> TFT (device type 1). (e) The microscopic image of the homojunction MoS<sub>2</sub> TFT. (f) AFM image of the channel region in the homojunction MoS<sub>2</sub> TFT. (g) The MoS<sub>2</sub> films in the homojunction MoS<sub>2</sub> TFT with thickness of ~17 nm and ~58 nm, respectively, measured by AFM. (h) The transfer characteristics of the homojunction MoS<sub>2</sub> TFT (device type 2). (i) The microscopic image of the thick MoS<sub>2</sub> TFT. (j) AFM image of the channel region in the thick MoS<sub>2</sub> TFT. (k) The thickness of ~56 nm MoS<sub>2</sub> in the thick MoS<sub>2</sub> TFT measured by AFM. (l) The transfer characteristics of the thick MoS<sub>2</sub> TFT (device type 3).
